# Supplementary material for: A Gellan Gum, Polyethylene Glycol, Hydroxyapatite Composite Scaffold with the Addition of Ginseng Derived Compound K with Possible Applications in Bone Regeneration
Source: MDPI journal article supplement (doi:10.3390/gels10040257), 2024-04-10
Supplement: s1 [file s1]

# A Gellan Gum, Polyethylene Glycol, Hydroxyapatite Composite Scaffold with the Addition of Ginseng Derived Compound K with Possible Applications in Bone Regeneration

Muthukumar Thangavelu <sup>1,\*†</sup>, Pil-Yun Kim <sup>2,†</sup>, Hunhwi Cho <sup>2</sup>, Jeong-Eun Song <sup>2</sup>, Sunjae Park <sup>3</sup>, Alessio Bucciarelli <sup>4,\*</sup> and Gilson Khang <sup>2,\*</sup>

<sup>1</sup> Linkocare Life Sciences AB, Mjärdevi Science Park, 583 30 Linköping, Sweden

<sup>2</sup> Department of Bionanotechnology and Bio-Convergence Engineering, Jeonbuk National University, 567 Baekje-daero, Deokjin-gu, Jeonju-si 54896, Jeonbuk, Republic of Korea

<sup>3</sup> Department of Polymer Nano Science & Technology and Polymer Materials Fusion Research Center, Jeonbuk National University, 567 Baekje-daero, Deokjin-gu, Jeonju-si 54896, Jeonbuk, Republic of Korea

<sup>4</sup> Laboratorio RAMSES, IRCCS Istituto Ortopedico Rizzoli, Via di Barbiano 1/10, 40136 Bologna, Italy

\* Correspondence: auromuthu@gmail.com (M.T.); alessio.bucciarelli@ior.it (A.B.); gskhang@jbnu.ac.kr (G.K.)

† These authors contributed equally to this work.

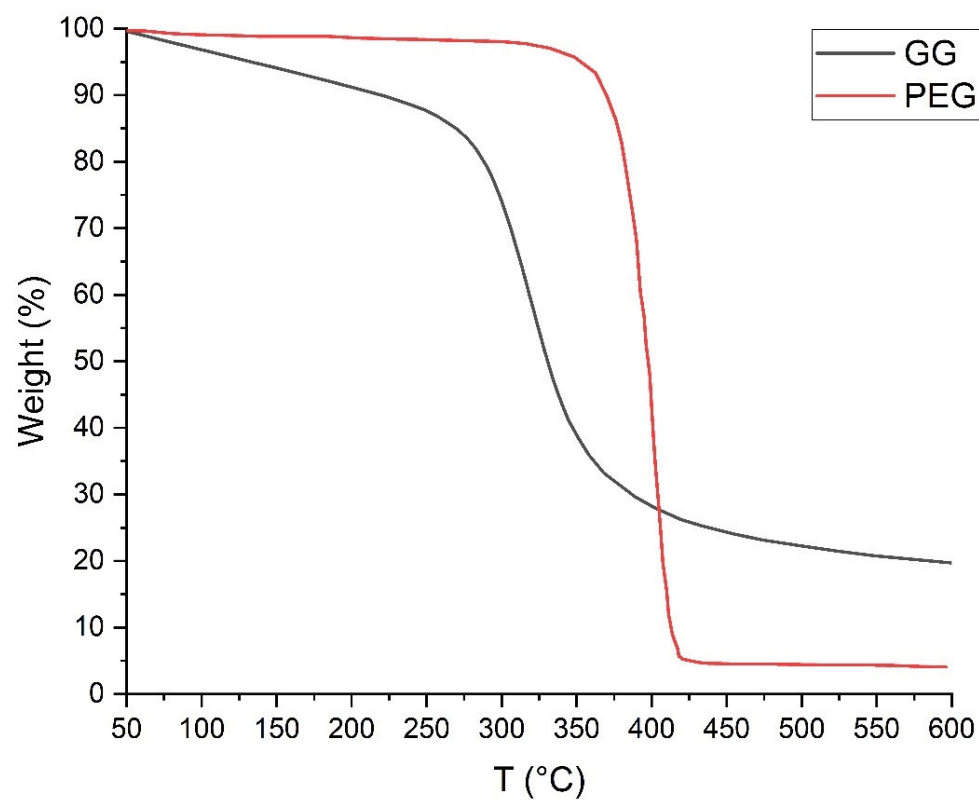

**Figure S1:** TGA of the raw PEG 6000 and GG. In the composite scaffold this results in a curve with a variable slope as effectively observed in GG:PEG scaffold.

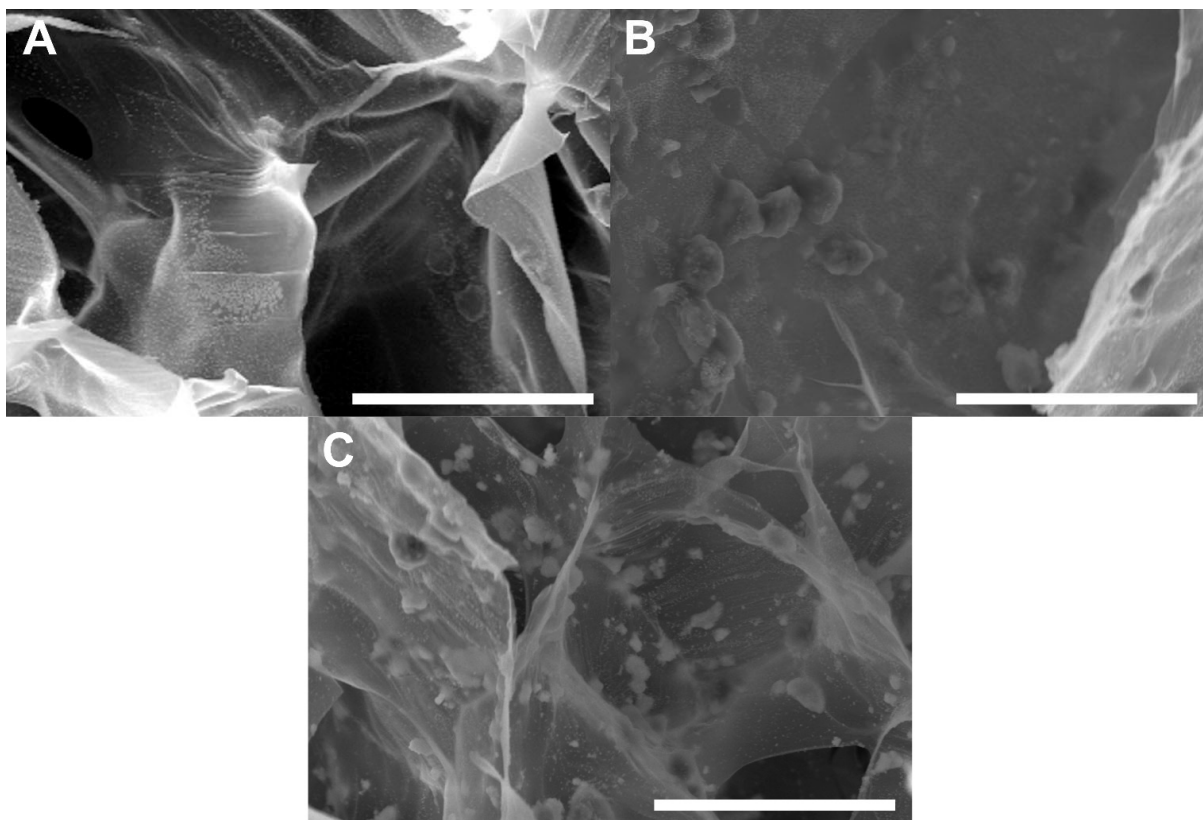

**Figure S2:** SEM on scaffolds with fixed cells at day 21. We compared the (A) GG:PEG, (B) GG:PEG:HA20% and (C) GG:PEG:HA20%:CK. The images confirmed the same trend reported by the MTT assay an increasing number of cells were populating the last scaffold.

**Table S1:** Result of the post-hoc Tukey's multiple comparisons test on MTT assay results.

| Tukey's multiple comparisons test | Mean Diff. | 95.00% CI of diff. | Summary | Adjusted P Value |
|-----------------------------------|------------|--------------------|---------|------------------|
| <b>Day 1</b>                      |            |                    |         |                  |
| GG:PEG vs. GG:PEG:HA10%           | 9.505      | -7.226 to 26.24    | ns      | 0.4996           |
| GG:PEG vs. GG:PEG:HA15%           | -13.28     | -30.01 to 3.455    | ns      | 0.1802           |
| GG:PEG vs. GG:PEG:HA20%           | 24.82      | 8.093 to 41.55     | **      | 0.001            |
| GG:PEG vs. GG:PEG:HA20%:CK        | 29.84      | 13.11 to 46.57     | ****    | <0.0001          |
| GG:PEGHA10% vs. GG:PEG:HA15%      | -22.78     | -39.51 to -6.050   | **      | 0.0029           |
| GG:PEG:HA10% vs. GG:PEG:HA20%     | 15.32      | -1.413 to 32.05    | ns      | 0.0875           |
| GG:PEG:HA10% vs. GG:PEG:HA20%:CK  | 20.33      | 3.604 to 37.06     | **      | 0.01             |
| GG:PEG:HA15% vs. GG:PEG:HA20%     | 38.1       | 21.37 to 54.83     | ****    | <0.0001          |
| GG:PEG:HA15% vs. GG:PEG:HA20%:CK  | 43.12      | 26.38 to 59.85     | ****    | <0.0001          |
| GG:PEG:HA20% vs. GG:PEG:HA20%:CK  | 5.016      | -11.71 to 21.75    | ns      | 0.914            |
| <b>Day 3</b>                      |            |                    |         |                  |
| GG:PEG vs. GG:PEG:HA10%           | 5.498      | -11.23 to 22.23    | ns      | 0.8839           |
| GG:PEG vs. GG:PEG:HA15%           | 12.61      | -4.117 to 29.34    | ns      | 0.2224           |
| GG:PEG vs. GG:PEG:HA20%           | 28.55      | 11.82 to 45.28     | ***     | 0.0001           |
| GG:PEG vs. GG:PEG:HA20%:CK        | 35.67      | 18.94 to 52.40     | ****    | <0.0001          |
| GG:PEGHA10% vs. GG:PEG:HA15%      | 7.116      | -9.615 to 23.85    | ns      | 0.7493           |
| GG:PEG:HA10% vs. GG:PEG:HA20%     | 23.06      | 6.326 to 39.79     | **      | 0.0026           |
| GG:PEG:HA10% vs. GG:PEG:HA20%:CK  | 30.17      | 13.44 to 46.90     | ****    | <0.0001          |
| GG:PEG:HA15% vs. GG:PEG:HA20%     | 15.94      | -0.7906 to 32.67   | ns      | 0.0688           |
| GG:PEG:HA15% vs. GG:PEG:HA20%:CK  | 23.05      | 6.323 to 39.78     | **      | 0.0026           |
| GG:PEG:HA20% vs. GG:PEG:HA20%:CK  | 7.113      | -9.617 to 23.84    | ns      | 0.7495           |
| <b>Day 7</b>                      |            |                    |         |                  |
| GG:PEG vs. GG:PEG:HA10%           | 18.65      | 1.920 to 35.38     | *       | 0.0218           |
| GG:PEG vs. GG:PEG:HA15%           | 12.35      | -4.380 to 29.08    | ns      | 0.2409           |
| GG:PEG vs. GG:PEG:HA20%           | 4.682      | -12.05 to 21.41    | ns      | 0.9318           |
| GG:PEG vs. GG:PEG:HA20%:CK        | -1.215     | -17.95 to 15.52    | ns      | 0.9996           |
| GG:PEGHA10% vs. GG:PEG:HA15%      | -6.3       | -23.03 to 10.43    | ns      | 0.8231           |
| GG:PEG:HA10% vs. GG:PEG:HA20%     | -13.97     | -30.70 to 2.762    | ns      | 0.1427           |
| GG:PEG:HA10% vs. GG:PEG:HA20%:CK  | -19.87     | -36.60 to -3.135   | *       | 0.0125           |
| GG:PEG:HA15% vs. GG:PEG:HA20%     | -7.669     | -24.40 to 9.061    | ns      | 0.6941           |
| GG:PEG:HA15% vs. GG:PEG:HA20%:CK  | -13.57     | -30.30 to 3.164    | ns      | 0.1637           |
| GG:PEG:HA20% vs. GG:PEG:HA20%:CK  | -5.897     | -22.63 to 10.83    | ns      | 0.8553           |
| <b>Day 14</b>                     |            |                    |         |                  |
| GG:PEG vs. GG:PEG:HA10%           | 1.64       | -15.09 to 18.37    | ns      | 0.9987           |
| GG:PEG vs. GG:PEG:HA15%           | 7.577      | -9.154 to 24.31    | ns      | 0.7036           |
| GG:PEG vs. GG:PEG:HA20%           | 2.827      | -13.90 to 19.56    | ns      | 0.989            |
| GG:PEG vs. GG:PEG:HA20%:CK        | -12.59     | -29.32 to 4.142    | ns      | 0.2241           |
| GG:PEGHA10% vs. GG:PEG:HA15%      | 5.937      | -10.79 to 22.67    | ns      | 0.8522           |
| GG:PEG:HA10% vs. GG:PEG:HA20%     | 1.187      | -15.54 to 17.92    | ns      | 0.9996           |
| GG:PEG:HA10% vs. GG:PEG:HA20%:CK  | -14.23     | -30.96 to 2.502    | ns      | 0.1304           |

|                                  |        |                  |      |         |
|----------------------------------|--------|------------------|------|---------|
| GG:PEG:HA15% vs. GG:PEG:HA20%    | -4.75  | -21.48 to 11.98  | ns   | 0.9284  |
| GG:PEG:HA15% vs. GG:PEG:HA20%:CK | -20.17 | -36.90 to -3.435 | *    | 0.0108  |
| GG:PEG:HA20% vs. GG:PEG:HA20%:CK | -15.42 | -32.15 to 1.315  | ns   | 0.0843  |
| <b>Day 21</b>                    |        |                  |      |         |
| GG:PEG vs. GG:PEG:HA10%          | 0.6535 | -16.08 to 17.38  | ns   | >0.9999 |
| GG:PEG vs. GG:PEG:HA15%          | 12.75  | -3.976 to 29.49  | ns   | 0.2129  |
| GG:PEG vs. GG:PEG:HA20%          | -8.177 | -24.91 to 8.553  | ns   | 0.6411  |
| GG:PEG vs. GG:PEG:HA20%:CK       | -26.06 | -42.79 to -9.329 | ***  | 0.0005  |
| GG:PEG:HA10% vs. GG:PEG:HA15%    | 12.1   | -4.630 to 28.83  | ns   | 0.2594  |
| GG:PEG:HA10% vs. GG:PEG:HA20%    | -8.831 | -25.56 to 7.900  | ns   | 0.5714  |
| GG:PEG:HA10% vs. GG:PEG:HA20%:CK | -26.71 | -43.44 to -9.983 | ***  | 0.0004  |
| GG:PEG:HA15% vs. GG:PEG:HA20%    | -20.93 | -37.66 to -4.201 | **   | 0.0075  |
| GG:PEG:HA15% vs. GG:PEG:HA20%:CK | -38.81 | -55.55 to -22.08 | **** | <0.0001 |
| GG:PEG:HA20% vs. GG:PEG:HA20%:CK | -17.88 | -34.61 to -1.152 | *    | 0.0307  |
